# Supplementary material for: Granulocyte activation markers in cerebrospinal fluid differentiate acute neuromyelitis spectrum disorder from multiple sclerosis
Source: HighWire-hosted journal article supplement (doi:10.1136/jnnp-2022-330796), 2023-04-19
Supplement: jnnp-2022-330796supp001_data_supplement.pdf [file jnnp-2022-330796supp001_data_supplement.pdf]

Original Investigation  
GAM\_NMOSD\_JNNP\_230223\_SupplMat\_edited030423\_track

Granulocyte markers identify acute NMOSD

**Supplemental Tables and Figures****Supplemental Table 1. Levels of biomarkers in acute NMOSD (discovery cohort) vs INDC and SC, discovery cohort**

| Marker type       | NMOSD acute                      | INDC                             | P     | SC                               | P <sup>‡</sup> |
|-------------------|----------------------------------|----------------------------------|-------|----------------------------------|----------------|
| Number of samples | 20                               | 15                               |       | 25                               |                |
| nEla              | 114.8<br>[44.9, 670.8]           | 94.8<br>[49.8, 255.7]            | 1.000 | 13.2<br>[9.2, 17.6]              | <0.001         |
| MPO               | 7.9<br>[2.8, 73.7]               | 6.1<br>[2.5, 55.7]               | 0.610 | 1.0<br>[0.2, 2.2]                | <0.001         |
| NGAL              | 6410.5<br>[5173.0, 17147.5]      | 9479.0<br>[5188.0, 15685.0]      | 0.499 | 3751.0<br>[2221.0, 5111.0]       | <0.001         |
| MMP-8             | 8.7<br>[3.3, 127.3]              | 2.7<br>[2.3, 6.4]                | 0.043 | 2.2<br>[1.6, 2.7]                | <0.001         |
| MMP-9             | 270.2<br>[37.3, 2195.0]          | 9850.5<br>[832.3, 51865.4]       | 0.003 | 30.8<br>[20.3, 40.1]             | 0.006          |
| TIMP-1            | 62660.0<br>[51160.0, 155750.0]   | 82970.0<br>[54600.0, 131450.0]   | 0.633 | 37490.0<br>[35530.0, 44650.0]    | <0.001         |
| GFAP              | 33958.8<br>[10730.5, 611223.2]   | 12125.3<br>[9313.4, 25050.4]     | 0.131 | 9818.0<br>[6725.0, 11551.7]      | 0.002          |
| S100B             | 249.2<br>[186.0, 496.6]          | 301.1<br>[222.8, 402.4]          | 0.755 | 248.0<br>[175.4, 287.0]          | 0.230          |
| NfL               | 1732.0<br>[1134.8, 3696.9]       | 1278.3<br>[448.4, 5334.6]        | 0.188 | 436.8<br>[316.3, 517.2]          | <0.001         |
| ICAM-1            | 3697.5<br>[2004.5, 6224.5]       | 4862.0<br>[3323.0, 9052.0]       | 0.131 | 2066.0<br>[1744.0, 2441.0]       | 0.004          |
| VCAM-1            | 266900.0<br>[226175.0, 464200.0] | 353000.0<br>[275600.0, 449000.0] | 0.400 | 157400.0<br>[133700.0, 209000.0] | <0.001         |
| CXCL13            | 11.4<br>[3.9, 47.9]              | 8.5<br>[2.5, 84.9]               | 0.877 | 0.6<br>[0.5, 0.9]                | <0.001         |

Biomarker values are medians [IQR] in pg/ml. P values  $\leq 0.05$  are with green background.<sup>‡</sup>P of comparison of acute NMOSD with SC.

Abbreviations: CXCL13: C-X-C motif chemokine 13; GFAP: glial fibrillary acidic protein; ICAM-1: intercellular adhesion molecule-1; INDC: inflammatory neurological disease control; MMP: matrix metalloproteinase; MPO: myeloperoxidase; nEla: neutrophil elastase; NGAL: neutrophil gelatinase-associated lipocalin; NfL: neurofilament light chain; NMOSD: neuromyelitis optica spectrum disorder; RRMS: relapsing-remitting multiple sclerosis; S100B: S100 calcium-binding protein B; SC: symptomatic control; TIMP-1: tissue inhibitor of metalloproteinase-1; VCAM-1: vascular cell adhesion molecule-1.

Original Investigation  
 GAM\_NMOSD\_JNNP\_230223\_SupplMat\_edited030423\_track

Granulocyte markers identify acute NMOSD

**Supplemental Table 2. GAM levels in all NMOSD patients with and without corticosteroid pre-treatment**

| Corticosteroid pre-treatment (N)                                    | No<br>23                        | Yes<br>44                        | P     |
|---------------------------------------------------------------------|---------------------------------|----------------------------------|-------|
| Days between disease exacerbation and lumbar puncture; median [IQR] | 13.0<br>[6.0, 43.5]             | 13.0<br>[7.0, 44.2]              | 0.982 |
| nEla                                                                | 199.7<br>[60.6, 409.9]          | 36.4<br>[13.0, 179.4]            | 0.006 |
| MPO                                                                 | 8.2<br>[1.3, 385.3]             | 3.8<br>[0.3, 91.6]               | 0.214 |
| NGAL                                                                | 5095.0<br>[2423.0, 7837.0]      | 4480.0<br>[2180.0, 6760.9]       | 0.870 |
| MMP-8                                                               | 5.4<br>[3.0, 16.4]              | 3.6<br>[2.0, 18.4]               | 0.499 |
| TIMP-1                                                              | 52020.0<br>[21725.0, 63212.0]   | 45870.0<br>[30832.5, 63017.5]    | 0.891 |
| S100B                                                               | 225.3<br>[159.9, 606.2]         | 225.9<br>[182.7, 309.0]          | 0.900 |
| ICAM-1                                                              | 3531.0<br>[1305.5, 4488.0]      | 2312.5<br>[1826.0, 3772.5]       | 0.932 |
| VCAM-1                                                              | 230900.0<br>[159450.0, 31685.0] | 212000.0<br>[158250.0, 305425.0] | 0.716 |

Biomarker values are medians [IQR] in pg/ml. P values  $\leq 0.05$  are with green background.

Abbreviations: ICAM-1: intercellular adhesion molecule-1; MMP: matrix metalloproteinase; MPO: myeloperoxidase; nEla: neutrophil elastase; NGAL: neutrophil gelatinase-associated lipocalin; NMOSD: neuromyelitis optica spectrum disorder; S100B: S100 calcium-binding protein B; TIMP-1: tissue inhibitor of metalloproteinase-1; VCAM-1: vascular cell adhesion molecule-1.

Original Investigation  
GAM\_NMOSD\_JNNP\_230223\_SupplMat\_edited030423\_track

Granulocyte markers identify acute NMOSD

**Supplemental Table 3. Association between EDSS and biomarkers in samples of NMOSD patients with and without corticosteroid pre-treatment**

| Marker | all NMOSD<br>N=67   |        | acute NMOSD<br>N=41  |        | s/c NMOSD<br>N=26    |       |
|--------|---------------------|--------|----------------------|--------|----------------------|-------|
|        | Rho<br>[CI]         | p      | Rho<br>[CI]          | p      | Rho<br>[CI]          | p     |
| nEla   | 0.38<br>[0.16-0.57] | 0.001  | 0.24<br>[-0.11-0.48] | 0.135  | 0.41<br>[0.03-0.69]  | 0.036 |
| MPO    | 0.31<br>[0.08-0.52] | 0.010  | 0.20<br>[-0.1-0.48]  | 0.213  | 0.21<br>[-0.19-0.56] | 0.293 |
| NGAL   | 0.46<br>[0.24-0.63] | <0.001 | 0.50<br>[0.22-0.70]  | <0.001 | 0.27<br>[-0.13-0.60] | 0.181 |
| MMP-8  | 0.40<br>[0.18-0.59] | <0.001 | 0.40<br>[0.11-0.63]  | 0.009  | 0.27<br>[-0.13-0.60] | 0.178 |
| TIMP-1 | 0.35<br>[0.12-0.54] | 0.004  | 0.39<br>[0.10-0.63]  | 0.011  | 0.28<br>[-0.12-0.60] | 0.168 |
| ICAM-1 | 0.39<br>[0.16-0.57] | 0.002  | 0.47<br>[0.19-0.68]  | 0.002  | 0.18<br>[-0.22-0.53] | 0.375 |
| VCAM-1 | 0.38<br>[0.15-0.57] | 0.001  | 0.46<br>[0.17-0.67]  | 0.003  | 0.14<br>[-0.26-0.50] | 0.501 |

P values  $\leq 0.05$  are with green background.

Abbreviations: CXCL13: C-X-C motif chemokine 13; GFAP: glial fibrillary acidic protein; ICAM-1: intercellular adhesion molecule-1; MMP: matrix metalloproteinase; MPO: myeloperoxidase; nEla: neutrophil elastase; NGAL: neutrophil gelatinase-associated lipocalin; NfL: neurofilament light chain; NMOSD: neuromyelitis optica spectrum disorder; RRMS: relapsing-remitting multiple sclerosis; TIMP-1: tissue inhibitor of metalloproteinase-1; S100B: S100 calcium-binding protein B; VCAM-1: vascular cell adhesion molecule-1.

Original Investigation

Granulocyte markers identify acute NMOsD

GAM\_NMOsD\_JNNP\_230223\_SupplMat\_edited030423\_track

### Supplemental Figure 1A. Biomarker levels in NMOsD, RRMS, SC and INDCs in discovery cohort

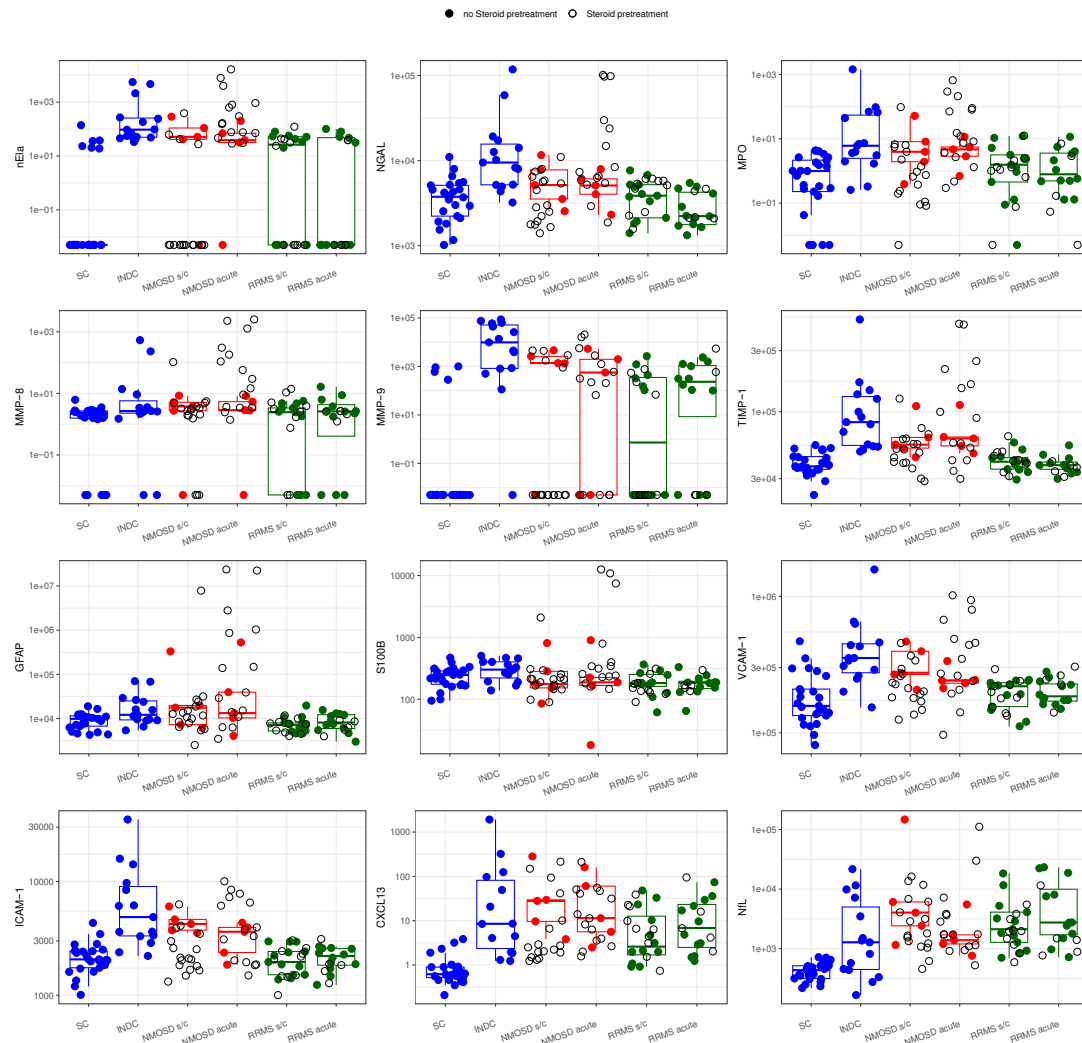

Boxplot of biomarker levels on log-scale (pg/ml) by patient population. Patients with corticosteroid pre-treatment (○) are not used for the boxplot calculations. Note that many patients under corticosteroid treatment in acute NMOsD have values above the 3<sup>rd</sup> quartile/75<sup>th</sup> percentile.

Abbreviations: CXCL13: C-X-C motif chemokine 13; GFAP: glial fibrillary acidic protein; ICAM-1: intercellular adhesion molecule-1; INDC: inflammatory neurological disease control; MMP: matrix metalloproteinase; MPO: myeloperoxidase; nEla: neutrophil elastase; NfL: neurofilament light chain; NGAL: neutrophil gelatinase-associated lipocalin; NMOsD: neuromyelitis optica spectrum disorder; RRMS: relapsing-remitting multiple sclerosis; TIMP-1: tissue inhibitor of metalloproteinase-1; S100B: S100 calcium-binding protein B; s/c: subacute/chronic; SC: symptomatic control; VCAM-1: vascular cell adhesion molecule-1.

Original Investigation  
 GAM\_NMOsD\_JNNP\_230223\_SupplMat\_edited030423\_track

Granulocyte markers identify acute NMOsD

### Supplemental Figure 1B: Effect of immunomodulatory therapy prior to lumbar puncture on marker levels in NMOsD patients

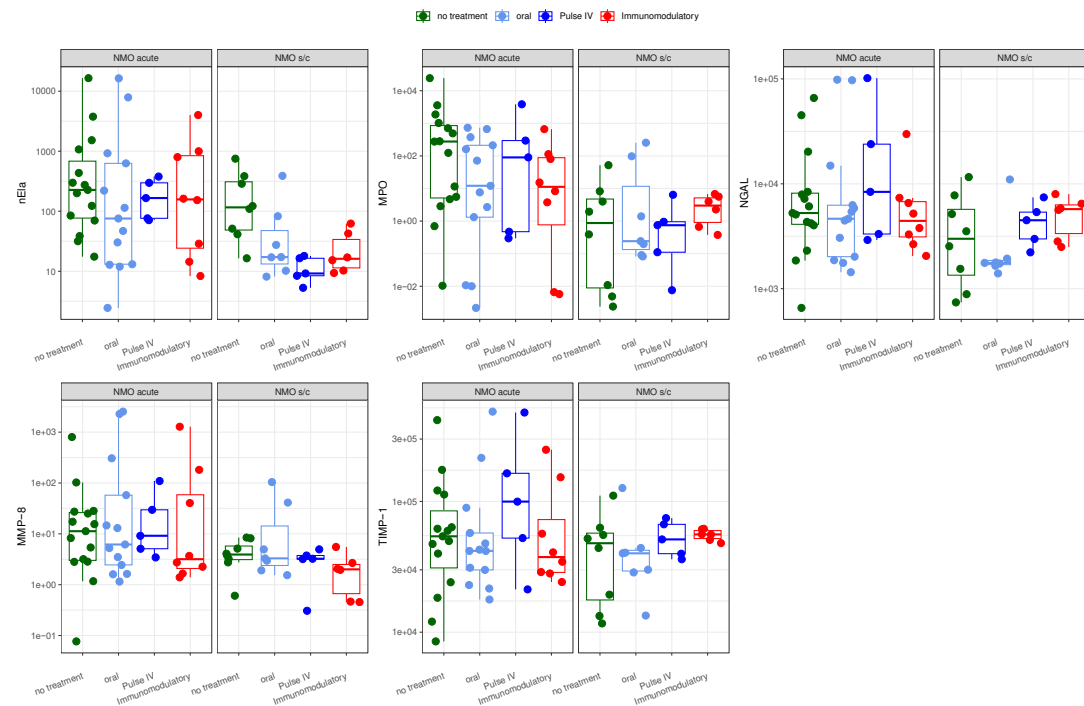

Boxplot of biomarker levels on log-scale (pg/ml) in acute and s/c NMOsD patients, subcategorised for 'no treatment' (●), 'oral steroids only' (●), 'pulse iv steroids' (●), and 'steroids + immunomodulatory therapy' (●).

Abbreviations: MMP: matrix metalloproteinase; MPO: myeloperoxidase; nEla: neutrophil elastase; NGAL: neutrophil gelatinase-associated lipocalin; NMOsD: neuromyelitis optica spectrum disorder; TIMP-1: tissue inhibitor of metalloproteinase-1.

Original Investigation  
 GAM\_NMOSD\_JNNP\_230223\_SupplMat\_edited030423\_track

Granulocyte markers identify acute NMOSD

### Supplemental Figure 2. Correlation of levels of elastase with ICAM-1 and VCAM-1 in pooled cohorts of NMOSD and RRMS patients.

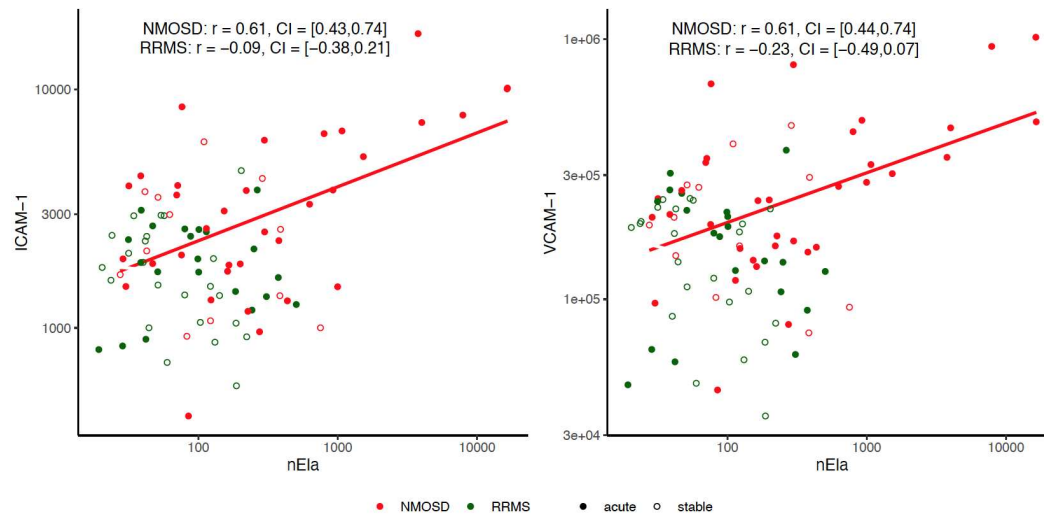

CSF samples from patients (acute (●) and s/c (○) phase, without and with corticosteroid pretreatment) with quantifiable levels of nEla were correlated with levels of ICAM-1 and VCAM-1, respectively. Biomarker values are medians [IQR] in pg/ml. NMOSD: (red), RRMS: (green). Regression line is derived from samples of NMOSD patients with and without corticosteroid pretreatment. The exclusion of NMOSD patients with iv corticosteroid pre-treatment produced virtually identical regression line characteristics: ICAM-1:  $r=0.65$ , CI=[0.47, 0.77]; VCAM-1:  $r=0.72$ , CI=[0.57, 0.82]. Regression line characteristics from NMOSD patients with iv or oral corticosteroid pre-treatment excluded were: ICAM-1:  $r=0.56$ , CI=[0.30, 0.75]; VCAM-1:  $r=0.46$ , CI=[0.16, 0.68].

Abbreviations: CI: confidence interval; ICAM-1: intercellular adhesion molecule-1; nEla: neutrophil elastase; NMOSD: neuromyelitis optica spectrum disorder; RRMS: relapsing-remitting multiple sclerosis; VCAM-1: vascular cell adhesion molecule-1.

Original Investigation  
 GAM\_NMOSD\_JNNP\_230223\_SupplMat\_edited030423\_track

Granulocyte markers identify acute NMOSD

**Supplemental Figure 3. Correlation of CSF granulocyte cell count  $\geq 1$  with biomarkers in discovery set NMOSD patients with and without corticosteroid pre-treatment**

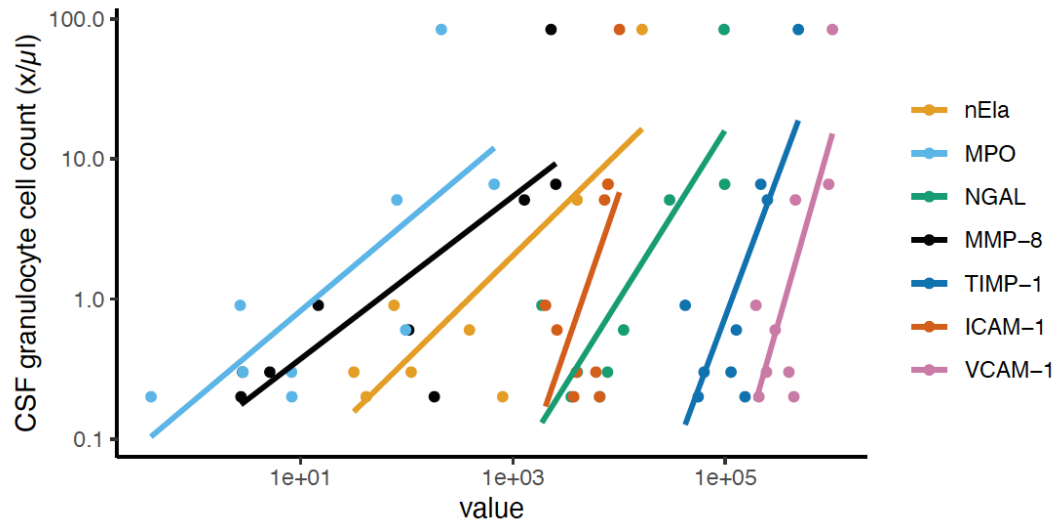

Biomarker values are in pg/ml on the x-axis. There was a strong (Rho 0.60-0.79) correlation of cell-specific GAM levels in those nine NMOSD patients with a CSF granulocyte cell count  $\geq 1$  (Rho, p-value: nEla =0.70, 0.037; MPO: 0.70, 0.037; MMP-8: 0.76, 0.018; NGAL: 0.69, 0.040), for TIMP-1 (0.60, 0.090) set significance levels were not reached.

In addition, strong correlation of CSF granulocyte cell count was present for S100B (0.77, 0.014) and GFAP (0.68, 0.044), and a moderate, but not significant correlation (Rho 0.40-0.59) for VCAM-1 (0.59, 0.096) and for ICAM-1 (0.50, 0.166). NfL and CXCL13 showed no correlation with the CSF granulocyte cell count.

Abbreviations: CXCL13: C-X-C motif chemokine 13; GFAP: glial fibrillary acidic protein; ICAM-1: intercellular adhesion molecule-1; MMP: matrix metalloproteinase; MPO: myeloperoxidase; nEla: neutrophil elastase; NfL: neurofilament light chain; NGAL: neutrophil gelatinase-associated lipocalin; NMOSD: neuromyelitis optica spectrum disorder; TIMP-1: tissue inhibitor of metalloproteinase-1; S100B: S100 calcium-binding protein B; VCAM-1: vascular cell adhesion molecule-1.
